# Supplementary material for: Mapping and Characterization of Target-Site Resistance to Cyclic Ketoenol Insecticides in Cabbage Whiteflies, Aleyrodes proletella (Hemiptera: Aleyrodidae)
Source: MDPI journal article supplement (doi:10.3390/insects15030178), 2024-03-06
Supplement: s1 [file s1]

# SUPPLEMENT

## Mapping and characterization of target-site resistance to cyclic ketoenol insecticides in cabbage whiteflies, *Aleyrodes proletella* (Hemiptera: Aleyrodidae)

Viola Müller<sup>1,2</sup>, Frank Maiwald<sup>1</sup>, Gudrun Lange<sup>3</sup> and Ralf Nauen<sup>1,\*</sup>

<sup>1</sup> Bayer AG, Crop Science Division, R&D, 40789 Monheim, Germany

<sup>2</sup> University of Bonn, INRES, 53115 Bonn, Germany

<sup>3</sup> Bayer AG, Crop Science Division, R&D, 65926 Frankfurt, Germany

\* Correspondence: [ralf.nauen@bayer.com](mailto:ralf.nauen@bayer.com); Tel.: +49-2173-384441

**Table S1.** Samples of *Aleyrodes proletella* adults collected in different European countries and preserved in ethanol (70% v/v) for pyrosequencing diagnostic.

| Year | Sample-ID         | Country     | Venue                     | Host             |
|------|-------------------|-------------|---------------------------|------------------|
| 2019 | NAR2019-131       | Netherlands | Mijnsherenland            | Brussels sprouts |
|      | NAR2019-132       | Netherlands | Klaaswaal                 | Brussels sprouts |
|      | NAR2019-148       | Poland      | Warsaw                    | Unknown          |
|      | NAR2019-149       | Poland      | Warsaw                    | Unknown          |
|      | NAR2019-150       | Netherlands | Schagerbrug               | Green cabbage    |
|      | NAR2019-151       | Netherlands | Oosternijkerk             | Broccoli         |
|      | NAR2019-162       | Switzerland | Zollikofen                | Brussels sprouts |
|      | NAR2019-163       | Spain       | Andalucia                 | Broccoli         |
|      | NAR2019-164       | Spain       | Murcia                    | Broccoli         |
|      | NAR2019-165       | Spain       | Murcia                    | Broccoli         |
|      | NAR2019-166       | Spain       | Murcia                    | Broccoli         |
|      | NAR2019-183       | Spain       | La Rioja                  | Cauliflower      |
| 2020 | NAR2020-119       | Belgium     | Roeselare                 | Brussels sprouts |
|      | NAR2020-120       | Belgium     | Lier                      | Brussels sprouts |
|      | NAR2020-121       | Belgium     | Kruishoutem (Kruisem)     | Brussels sprouts |
|      | NAR2020-122       | Netherlands | Den Bommel                | Brussels sprouts |
|      | NAR2020-123       | Netherlands | Oud-Beijerland            | Brussels sprouts |
|      | NAR2020-124       | Netherlands | Heerjansdam               | Brussels sprouts |
| 2021 | NAR2021-048       | Spain       | Picassent                 | Cabbage          |
|      | NAR2021-049       | Spain       | Picassent                 | Cabbage          |
|      | NAR2021-050       | Spain       | Alzira                    | Cabbage          |
|      | NAR2021-051       | Spain       | Simat de la Valldigna     | Cabbage          |
|      | NAR2021-052       | Spain       | Algemesi                  | Cabbage          |
|      | NAR2021-053       | Spain       | Alzira                    | Cabbage          |
|      | NAR2021-054       | Spain       | Manuel                    | Cabbage          |
|      | NAR2021-055       | Spain       | Simat de la Valldigna     | Cabbage          |
|      | NAR2021-060       | Spain       | Finca Las Cabecicas Lorca | Cabbage          |
|      | NAR2021-061       | Spain       | Lorca                     | Cabbage          |
|      | NAR2021-110       | Netherlands | Den Bommel                | Brussel sprouts  |
|      | NAR2021-111       | Netherlands | Hellevoetsluis            | Brussel sprouts  |
|      | NAR2021-112       | Netherlands | Mijnsheerenland           | Brussel sprouts  |
|      | NAR2021-113       | Netherlands | Bruinisse                 | Cabbage          |
|      | NAR2021-114       | Netherlands | Zeewolde                  | Cabbage          |
|      | NAR2021-115       | Netherlands | Den Bommel                | Cabbage          |
|      | NAR2021-116       | Netherlands | Hellevoetsluis            | Cabbage          |
|      | NAR2021-117       | Netherlands | Mijnsheerenland           | Cabbage          |
|      | NAR2021-120       | Netherlands | Sexbierum                 | Cabbage          |
|      | ALTHFL_DEU21_0001 | Germany     | Hannover                  | Savoy cabbage    |
|      | ALEUPR_DEU21_0002 | Germany     | Hannover                  | Savoy cabbage    |

**Table S2.** Primer pairs used for RT-qPCR analysis of *Aleyrodes proletella* acetyl-CoA carboxylase (ACC) expression levels.

| Primer        | Forward primer (5' to 3') | Reverse primer (5' to 3') | Amplicon, bp |
|---------------|---------------------------|---------------------------|--------------|
| ACC           | AGGTACGGCGCCAGATTATG      | AACCACTGTCGTTGCTAGG       | 121          |
| <i>Actin</i>  | CGGTCGTACCACTGGTATCG      | AAACGGAGGATGGCATGAGG      | 99           |
| <i>ATP</i>    | AAGTCAACCACCGAGTCAGC      | TGAAGACCTTTCTGCCGAGC      | 129          |
| <i>HSP-90</i> | AGCTCTCCGTGCTAAAGCTG      | CTGATCATGCGGTGAATGCG      | 147          |

**Table S3.** Primer pairs used for *Aleyrodes proletella* acetyl-CoA carboxylase (ACC) genotyping by pyrosequencing.

| Primer         | Forward primer (5' to 3') | Reverse primer (5' to 3')    | Amplicon, bp |
|----------------|---------------------------|------------------------------|--------------|
| ACC A2083V     | TGTGGATGAGTTACGTGTTTACAA  | [btn]GGGGTTAATGGTGGGATCAACTA |              |
| ACC A2083V_seq | AGAGGAGGAGCTTGG           |                              | 106          |

**Table S4.** Genotyping by pyrosequencing of alcohol-preserved individuals of *Aleyrodes proletella* for the presence of the A2083V mutation in the ACC carboxyltransferase (CT) domain. Genotypes: A/A, susceptible homozygotes; A/V, heterozygotes; V/V, resistant homozygotes.

| Sample            | Country     | Year | Genotype (%) |     |     |
|-------------------|-------------|------|--------------|-----|-----|
|                   |             |      | A/A          | A/V | V/V |
| NAR2019-131       | Netherlands | 2019 | 100          | 0   | 0   |
| NAR2019-132       | Netherlands | 2019 | 100          | 0   | 0   |
| NAR2019-148       | Poland      | 2019 | 100          | 0   | 0   |
| NAR2019-149       | Poland      | 2019 | 90           | 10  | 0   |
| NAR2019-150       | Netherlands | 2019 | 100          | 0   | 0   |
| NAR2019-151       | Netherlands | 2019 | 100          | 0   | 0   |
| NAR2019-162       | Switzerland | 2019 | 0            | 0   | 100 |
| NAR2019-163       | Spain       | 2019 | 100          | 0   | 0   |
| NAR2019-164       | Spain       | 2019 | 100          | 0   | 0   |
| NAR2019-165       | Spain       | 2019 | 100          | 0   | 0   |
| NAR2019-166       | Spain       | 2019 | 100          | 0   | 0   |
| NAR2019-183       | Spain       | 2019 | 100          | 0   | 0   |
| NAR2020-119       | Belgium     | 2020 | 100          | 0   | 0   |
| NAR2020-120       | Belgium     | 2020 | 100          | 0   | 0   |
| NAR2020-121       | Belgium     | 2020 | 100          | 0   | 0   |
| NAR2020-122       | Netherlands | 2020 | 0            | 0   | 100 |
| NAR2020-123       | Netherlands | 2020 | 0            | 30  | 70  |
| NAR2020-124       | Netherlands | 2020 | 0            | 50  | 50  |
| NAR2021-048       | Spain       | 2021 | 100          | 0   | 0   |
| NAR2021-049       | Spain       | 2021 | 100          | 0   | 0   |
| NAR2021-050       | Spain       | 2021 | 100          | 0   | 0   |
| NAR2021-051       | Spain       | 2021 | 100          | 0   | 0   |
| NAR2021-052       | Spain       | 2021 | 100          | 0   | 0   |
| NAR2021-053       | Spain       | 2021 | 100          | 0   | 0   |
| NAR2021-054       | Spain       | 2021 | 0            | 100 | 0   |
| NAR2021-055       | Spain       | 2021 | 20           | 80  | 0   |
| NAR2021-060       | Spain       | 2021 | 100          | 0   | 0   |
| NAR2021-061       | Spain       | 2021 | 100          | 0   | 0   |
| NAR2021-110       | Netherlands | 2021 | 0            | 10  | 90  |
| NAR2021-111       | Netherlands | 2021 | 0            | 0   | 100 |
| NAR2021-112       | Netherlands | 2021 | 0            | 10  | 90  |
| NAR2021-113       | Netherlands | 2021 | 0            | 10  | 90  |
| NAR2021-114       | Netherlands | 2021 | 100          | 0   | 0   |
| NAR2021-115       | Netherlands | 2021 | 0            | 10  | 90  |
| NAR2021-116       | Netherlands | 2021 | 0            | 0   | 100 |
| NAR2021-117       | Netherlands | 2021 | 0            | 0   | 100 |
| NAR2021-120       | Netherlands | 2021 | 100          | 0   | 0   |
| ALTHFL_DEU21_0001 | Germany     | 2021 | 30           | 40  | 30  |
| ALEUPR_DEU21_0002 | Germany     | 2021 | 0            | 60  | 40  |

**Figure S1.** Partial nucleotide sequence of a cDNA fragment of the carboxyltransferase (CT) domain of *Aleyrodes proletella* ACC harboring the mutation site A2083 (red). Annealing positions for primers for pyrosequencing diagnostics of the mutation site A2083V are indicated by blue arrows.

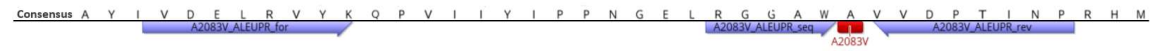

**Figure S2.** Translation of GenBank Acc. No. GJYF01046828.1 representing the amino acid sequence of ACC of *Aleyrodes proletella* strain 3/19. The protein sequences of ACC in strains 3/19, 4/19, 5/20 and 6/19 are identical. Strains 2/20 and SPI-2/20 have A2084V (shown in red).

```

1  MEGDTGPKTN NVNFIVGDDG QDGEIANGLI NTISEEDERK ENRDSFSPSGN
51  GPTGLISNSS SYNMMFGLAE RRKRLRPSMS QGTVIHQRLD DKDFTVGTPE
101 EFVKRFKGTR VINKVLIANN GIAAVKCMRS IRRWSYEMFK NERAVRFVVM
151 VTPEDLKANA EYIKMADHYV PVPGGTNNNN YANVELIVDI ALRTQVQAVW
201 AGWGHASENP KLPELLHKNN IAFIGPPEKA MWALGDKIAS SIVAQTAEIP
251 TLPWSGSELT AQYSGKKIKI SSDLYKKGCV SSVEEGLRSA HKIGFPIMIK
301 ASEGSGGKGI RKVEAAEEFP NLFRQVQSEV PGSPIFIMKL ARCARHLEVQ
351 LLADQYGNAI SLFGRDCSIQ RRHQKIIEEA PAVIAEPDVF ENMEKAAVRL
401 AKMVGYSAG TVEYLYDPSE GQYFFLELNP RLQVEHPCTE MVADVNLPA
451 QLQIAMGLQL NCIKDIRLLY GESPWGDNYI DFDEPRHKPQ PWGHVIAARI
501 TSENPDEGFK PSSGTVQELN FRSSKNVWGY FSVAASGGLH EFADSQFGHC
551 FSWGENREQA RENLVIALKE LSIRGDFRTT VEYLITLLET ESFQINTIDT
601 AWLDLLISER VQSEKPDVLL GVMCGALHIA DRKVCDAFQN FQTSLEGRQI
651 QGCNTLDHNV QVELIHDGLK YKVHATKSLG NSYFLVMNGS FKEIELHRLS
701 DGGILLSVDG SSFTTYMREE VDRYRIVIGN LTCVFEEKEND PSLLRSPSAG
751 KLISYLIEDG GHVSKGQAYA EIEVMKMMVT LTANESGLVT FAKRPGAVLD
801 AGSLIGTLEL DDPSLVSKAL DYKGEFFELD VSTPMVGEKL NHAHNHYRQM
851 LDNILAGFCL PDPYHLVRLR EVIEKFMSSL RDPSPLELLEL QEVISSISGR
901 IPISVEKKIR KLMTLYERNI TSVLAQFPSQ QIAGVIDSHA ATLQKRSDRD
951 GFFLTQGVIV QLVQRYRNGI RGRMKSASVHE LLRQYYEVES QFQQGHYDKC
1001 VMAIREKFKD DMAAVTSTIF SHGQVAKKNM LVTMLIDHLW SNEPGLTDEL
1051 ATTNLNELTSL NRSEHSRVAL RSRQVLIAAH QPAYELRHNQ MESIFLSAVD
1101 MYGHDFHPEN LQKLIQSETS IFDILHDFFY HTNRAVCNAA LEVYVRRVYI
1151 SYELTCLQHL ELSGEVPLVQ FQFLLPSSHP NRQKVTDPSS PIIADSPETE
1201 EPPSSTPTII HSYQRTGCMA AFESFDQFES YYDEILDLLD ELSPSTISPR
1251 IMEALSGSE SRMSTSINVS LSVGDNPRPP GLEDGLQVEP IHILCIAVKD
1301 NGDLEDEKLS KLLGDFCAKH REELKEKSIR RITFLALNRR QFPKLFTFRN
1351 CDFVEDRIY RHLEPGMAFQ LELNRMKTYH LEALPTSNRK MYLYLGRAKV
1401 AKGQEVTDNR FFIRSIIRHS DLITKEASFE YLQNEGERVL LEAMDELEVA
1451 FSHPLARTRD CNHIFLNFPV TVIMDSAKIE ESVTNMVMRY GARLWKLRVL
1501 QAELRMTIRT SPNSKTTNVR LCLANDSGYY LDICLYKEVV DPKTGIIKLE
1551 SYGSKQGPLH GLPTAIPYVT KDYLQKQRFQ AQSAGTTYCH DIPDMFRQMV
1601 ERQWKEFIEQ RPNDGIVKPS QLMDYVELVL EDDHLVEQKR LAGENTIGMV
1651 AWRITLNTPE YPDGREIIVI ANDITVRIGS FGPEEDLVFD LASKIARQMK
1701 VPRIYIAANS GARIGLAEV KSLFRVAVED PDEPDKGLKY LYLSTEDFIK
1751 ISACNSVRAI LIEDEGEARY KITDIIGKED GLGVENLRYA GMIAGETSEA
1801 YREIVTISMV SCRAIGIGAY LVRLGQRFVQ VENSIIITG YSALNKLGR
1851 EVYASNNQLG GIQIMYNNGI SHKTEPRDLG GIYSIVKWLK YIPKDKYSPV
1901 PVIKPADPVD REVGYMPTKT PYDPRWMIAG RYSPNNSNEW ESGFFDEGSW
1951 EEVMQPPAQV VVVGRRARLG IPMGVIAVET RTVEVKLPAD PANLDSEAKT
2001 LSQAGQVWFP DSAFKTAQAI KDFEHEDLPL IIFANWRGFS GGMKDMYEQV
2051 MKFGAYIVDE LRVKQPVII YIPNGELRG GAWAVVDPTI NPRHMEMYAD
2101 PESRGGVLEP EGIVEIKFRE KDILKTMHRI DQVIVPLKQK LAVPDLSPPE
2151 KAEVENQIVE REQYLKPMYH QVAIHFAHLH DTPERMMEKG VIHNIVPWRK
2201 SRTLLHWRVK RLLLENQIKC NLLKVQPQMD NGQAQAMLRR WFVEDKGTST
2251 AYLWENNESV VAWLMSQLSP DGSISPNSIV ANNIRCVQRD ALINQIKTSM
2301 EESPDVAQDA VVEMFQTLA NERSEVLRKL SHLETISKPE PQS

```

**Figure S3.** Multiple alignment of ACCase of *Bemisia tabaci*, *Myzus persicae*, predicted ACCase amino acid sequence of *Trialeurodes vaporariorum* and of five strains of *Aleyrodes proletella*, 2/20 (GenBank accession no. GJYF01020973.1; identical to SPI-2/20), 3/19 (GJYF01046828.1), 4/19 (GJYF01092380.1), 5/20 (GJYF01105771.1) and 6/19 (GJYF01137039.1). The carboxyltransferase (CT) domain (PF01039.35) is highlighted in yellow (AA 1658-2210). Previously described mutations E645K (*T. vaporariorum*; Karatolos et al., 2012) and A2083V (*B. tabaci*; Lueke et al., 2020) are highlighted in blue.

|                     |            |             |             |            |            |
|---------------------|------------|-------------|-------------|------------|------------|
|                     | 1          |             |             |            | 50         |
| BEMITA_QJQ31013     | MEGETGQKAN | NVNFIVGDDG  | QDGEIPNGIN  | T..ISEEDER | ERRENRDSFP |
| MYZUPE_XP_022181497 | ~~~MSSETSG | GVNFIVGDED  | GVDQAPAEIV  | NGELMKALEA | EKHENTDSFP |
| TRIAVA_ACCase       | ~~~~~      | ~~~~~       | ~~~~~       | ~~~~~      | ~~~~~      |
| 2/20 & SPI-2/20     | MEGDTGPKTN | NVNFIVGDDG  | QDGEIANGLI  | N..TI.SEED | ERKENRDSFP |
| 3/19                | MEGDTGPKTN | NVNFIVGDDG  | QDGEIANGLI  | N..TI.SEED | ERKENRDSFP |
| 4/19                | MEGDTGPKTN | NVNFIVGDDG  | QDGEIANGLI  | N..TI.SEED | ERKENRDSFP |
| 5/20                | MEGDTGPKTN | NVNFIVGDDG  | QDGEIANGLI  | N..TI.SEED | ERKENRDSFP |
| 6/19                | MEGDTGPKTN | NVNFIVGDDG  | QDGEIANGLI  | N..TI.SEED | ERKENRDSFP |
|                     | 51         |             |             |            | 100        |
| BEMITA_QJQ31013     | SGNG.PTGII | SSSSSYKDMF  | GLAERRKRLR  | PSMSQGTVIH | QRLLDKDFTV |
| MYZUPE_XP_022181497 | LGKETRMGVT | SNSSSYNNMF  | GLTEKRKRLR  | PSMSQGNVIH | QRLTEKDFNV |
| TRIAVA_ACCase       | ~~~~~      | ~~~~~       | ~~~~~       | ~~MSQGTVIH | QRLLDKDFTV |
| 2200                | SGNG.PTGLI | SNSSSYNNMF  | GLAERRKRLR  | PSMSQGTVIH | QRLLDKDFTV |
| 319                 | SGNG.PTGLI | SNSSSYNNMF  | GLAERRKRLR  | PSMSQGTVIH | QRLLDKDFTV |
| 419                 | SGNG.PTGLI | SNSSSYNNMF  | GLAERRKRLR  | PSMSQGTVIH | QRLLDKDFTV |
| 520                 | SGNG.PTGLI | SNSSSYNNMF  | GLAERRKRLR  | PSMSQGTVIH | QRLLDKDFTV |
| 619                 | SGNG.PTGLI | SNSSSYNNMF  | GLAERRKRLR  | PSMSQGTVIH | QRLLDKDFTV |
|                     | 101        |             |             |            | 150        |
| BEMITA_QJQ31013     | GTPEEFVKRF | KGTRVINKVL  | IANNGLIAAVK | CMRSIRRWSY | EMFKNERAVR |
| MYZUPE_XP_022181497 | STPEEFVKRF | KGTRVINKVL  | IANNGLIAAVK | CMRSVRRWSY | EMFRNERAVR |
| TRIAVA_ACCase       | GTPEEFVKRF | KGTRVINKVL  | IANNGLIAAVK | CMRSIRRWSY | EMFKNERAVR |
| 2200                | GTPEEFVKRF | KGTRVINKVL  | IANNGLIAAVK | CMRSIRRWSY | EMFKNERAVR |
| 319                 | GTPEEFVKRF | KGTRVINKVL  | IANNGLIAAVK | CMRSIRRWSY | EMFKNERAVR |
| 419                 | GTPEEFVKRF | KGTRVINKVL  | IANNGLIAAVK | CMRSIRRWSY | EMFKNERAVR |
| 520                 | GTPEEFVKRF | KGTRVINKVL  | IANNGLIAAVK | CMRSIRRWSY | EMFKNERAVR |
| 619                 | GTPEEFVKRF | KGTRVINKVL  | IANNGLIAAVK | CMRSIRRWSY | EMFKNERAVR |
|                     | 151        |             |             |            | 200        |
| BEMITA_QJQ31013     | FVVMVTPEDL | KANA EYIKMA | DHYVPVPGGT  | NNNNYANVEL | IVDIALRTQV |
| MYZUPE_XP_022181497 | FVVMVTPEDL | KANA EYIKMA | DHYVPVPGGT  | NNNNYANVEL | IVNIAIRSQV |
| TRIAVA_ACCase       | FVVMVTPEDL | KANA EYIKMA | DHYVPVPGGT  | NNNNYANVEL | IIDIATRTQV |
| 2200                | FVVMVTPEDL | KANA EYIKMA | DHYVPVPGGT  | NNNNYANVEL | IVDIALRTQV |
| 319                 | FVVMVTPEDL | KANA EYIKMA | DHYVPVPGGT  | NNNNYANVEL | IVDIALRTQV |
| 419                 | FVVMVTPEDL | KANA EYIKMA | DHYVPVPGGT  | NNNNYANVEL | IVDIALRTQV |
| 520                 | FVVMVTPEDL | KANA EYIKMA | DHYVPVPGGT  | NNNNYANVEL | IVDIALRTQV |
| 619                 | FVVMVTPEDL | KANA EYIKMA | DHYVPVPGGT  | NNNNYANVEL | IVDIALRTQV |
|                     | 201        |             |             |            | 250        |
| BEMITA_QJQ31013     | QAVWAGWGHA | SENPKLPELL  | HKNNIAFIGP  | PEKAMWALGD | KIASSIVAQT |
| MYZUPE_XP_022181497 | QAVWAGWGHA | SENPELPKLL  | DKNKIAFIGP  | PEKAMFALGD | KIASSIVAQT |
| TRIAVA_ACCase       | QAVWAGWGHA | SENPKLPELL  | HKNNIAFIGP  | PEKAMWALGD | KIASSIVAQT |
| 2200                | QAVWAGWGHA | SENPKLPELL  | HKNNIAFIGP  | PEKAMWALGD | KIASSIVAQT |
| 319                 | QAVWAGWGHA | SENPKLPELL  | HKNNIAFIGP  | PEKAMWALGD | KIASSIVAQT |
| 419                 | QAVWAGWGHA | SENPKLPELL  | HKNNIAFIGP  | PEKAMWALGD | KIASSIVAQT |
| 520                 | QAVWAGWGHA | SENPKLPELL  | HKNNIAFIGP  | PEKAMWALGD | KIASSIVAQT |

|                     |            |            |            |            |            |
|---------------------|------------|------------|------------|------------|------------|
| 619                 | QAVWAGWGHA | SENPKLPELL | HKNNIAFIGP | PEKAMWALGD | KIASSIVAQT |
|                     | 251        |            |            | 300        |            |
| BEMITA_QJQ31013     | AEIPTLPWSG | SELTAQYSGR | KIKISSELYK | RGCVSSVEEG | LRSQKIGFP  |
| MYZUPE_XP_022181497 | AEIPTLPWSG | SGVVGHYSGK | KIEIGPDLYK | KGCVASIEEG | LVSAEKVGYP |
| TRIAVA_ACCase       | AEIPT..... | .....      | ...ISSELYK | KGCVQNVVEG | LRSQKIGFP  |
| 2200                | AEIPTLPWSG | SELTAQYSGK | KIKISSDLYK | KGCVSSVEEG | LRSQKIGFP  |
| 319                 | AEIPTLPWSG | SELTAQYSGK | KIKISSDLYK | KGCVSSVEEG | LRSQKIGFP  |
| 419                 | AEIPTLPWSG | SELTAQYSGK | KIKISSDLYK | KGCVSSVEEG | LRSQKIGFP  |
| 520                 | AEIPTLPWSG | SELTAQYSGK | KIKISSDLYK | KGCVSSVEEG | LRSQKIGFP  |
| 619                 | AEIPTLPWSG | SELTAQYSGK | KIKISSDLYK | KGCVSSVEEG | LRSQKIGFP  |
|                     | 301        |            |            | 350        |            |
| BEMITA_QJQ31013     | VMIKASEGGG | GKGIRKVESS | EEFPNLFQV  | QSEVPGSPIF | IMKLARCARH |
| MYZUPE_XP_022181497 | IMIKASEGGG | GKGIRKVENT | EEFPNAYQV  | QAEVPGSPIF | IMKLAKCARH |
| TRIAVA_ACCase       | VMVKASEGGG | GKGIRKVESS | EEFPNLFQV  | QAEVPGSPIF | IMKLARCARH |
| 2200                | IMIKASEGGG | GKGIRKVEAA | EEFPNLFQV  | QSEVPGSPIF | IMKLARCARH |
| 319                 | IMIKASEGGG | GKGIRKVEAA | EEFPNLFQV  | QSEVPGSPIF | IMKLARCARH |
| 419                 | IMIKASEGGG | GKGIRKVEAA | EEFPNLFQV  | QSEVPGSPIF | IMKLARCARH |
| 520                 | IMIKASEGGG | GKGIRKVEAA | EEFPNLFQV  | QSEVPGSPIF | IMKLARCARH |
| 619                 | IMIKASEGGG | GKGIRKVEAA | EEFPNLFQV  | QSEVPGSPIF | IMKLARCARH |
|                     | 351        |            |            | 400        |            |
| BEMITA_QJQ31013     | LEVQLLADQY | GNAISLFGRD | CSIQRRHQKI | IEEAPAVIAE | PEIFEDMEKA |
| MYZUPE_XP_022181497 | LEVQLLADQY | GNAISLFGRD | CSIQRRHQKI | IEEAPAVIAE | PSVFEEMERA |
| TRIAVA_ACCase       | LEVQLLADQY | GNAISLFGRD | CSIQRRHQKI | IEEAPAVIAE | PEVFEAMEKA |
| 2200                | LEVQLLADQY | GNAISLFGRD | CSIQRRHQKI | IEEAPAVIAE | PDVFENMEKA |
| 319                 | LEVQLLADQY | GNAISLFGRD | CSIQRRHQKI | IEEAPAVIAE | PDVFENMEKA |
| 419                 | LEVQLLADQY | GNAISLFGRD | CSIQRRHQKI | IEEAPAVIAE | PDVFENMEKA |
| 520                 | LEVQLLADQY | GNAISLFGRD | CSIQRRHQKI | IEEAPAVIAE | PDVFENMEKA |
| 619                 | LEVQLLADQY | GNAISLFGRD | CSIQRRHQKI | IEEAPAVIAE | PDVFENMEKA |
|                     | 401        |            |            | 450        |            |
| BEMITA_QJQ31013     | AVRLAKMVG  | VSAGTVEYLY | DPSEGQYFFL | ELNPRLQVEH | PCTEMVADV  |
| MYZUPE_XP_022181497 | AVRIAKMVG  | VSAGTVEYLY | DT.DGNYYFL | ELNPRLQVEH | PCTEMVSDV  |
| TRIAVA_ACCase       | AVRLAKMVG  | VSAGTVEYLY | DPSEGQYFFL | ELNPRLQVEH | PCTEMVADV  |
| 2200                | AVRLAKMVG  | VSAGTVEYLY | DPSEGQYFFL | ELNPRLQVEH | PCTEMVADV  |
| 319                 | AVRLAKMVG  | VSAGTVEYLY | DPSEGQYFFL | ELNPRLQVEH | PCTEMVADV  |
| 419                 | AVRLAKMVG  | VSAGTVEYLY | DPSEGQYFFL | ELNPRLQVEH | PCTEMVADV  |
| 520                 | AVRLAKMVG  | VSAGTVEYLY | DPSEGQYFFL | ELNPRLQVEH | PCTEMVADV  |
| 619                 | AVRLAKMVG  | VSAGTVEYLY | DPSEGQYFFL | ELNPRLQVEH | PCTEMVADV  |
|                     | 451        |            |            | 500        |            |
| BEMITA_QJQ31013     | LPAAQLQVAM | GLQLHCKDI  | RVLYGESPWG | DSLIDFDQPR | HKPQPWGHVI |
| MYZUPE_XP_022181497 | LPAAQLQISM | GLALNCIKDI | RLLYSESANG | DSYIDFDAPR | HKPHPWGHVI |
| TRIAVA_ACCase       | LPAAQLQIAM | GLPLNCIKDI | RLLYGESPWG | DNLIDFDEPR | HKPQPWGHVI |
| 2200                | LPAAQLQIAM | GLQLNCIKDI | RLLYGESPWG | DNYIDFDEPR | HKPQPWGHVI |
| 319                 | LPAAQLQIAM | GLQLNCIKDI | RLLYGESPWG | DNYIDFDEPR | HKPQPWGHVI |
| 419                 | LPAAQLQIAM | GLQLNCIKDI | RLLYGESPWG | DNYIDFDEPR | HKPQPWGHVI |
| 520                 | LPAAQLQIAM | GLQLNCIKDI | RLLYGESPWG | DNYIDFDEPR | HKPQPWGHVI |
| 619                 | LPAAQLQIAM | GLQLNCIKDI | RLLYGESPWG | DNYIDFDEPR | HKPQPWGHVI |
|                     | 501        |            |            | 550        |            |
| BEMITA_QJQ31013     | AARITSENP  | EGFKPSSGT  | QELNFRSSKN | VWGYFSVAAS | GGLHEFADSQ |
| MYZUPE_XP_022181497 | AARITSENP  | EGFKPSSGT  | QELNFRSSKN | VWGYFSVAAS | GGLHEFADSQ |
| TRIAVA_ACCase       | AARITSENP  | EGFKPSSGT  | QELNFRSSKN | VWGYFSVAAS | GGLHEFADSQ |
| 2200                | AARITSENP  | EGFKPSSGT  | QELNFRSSKN | VWGYFSVAAS | GGLHEFADSQ |
| 319                 | AARITSENP  | EGFKPSSGT  | QELNFRSSKN | VWGYFSVAAS | GGLHEFADSQ |
| 419                 | AARITSENP  | EGFKPSSGT  | QELNFRSSKN | VWGYFSVAAS | GGLHEFADSQ |



|                     |            |            |            |            |            |
|---------------------|------------|------------|------------|------------|------------|
| 520                 | AARITSENP  | EGFKPSSGT  | QELNFRSSKN | VWGYFSVAAS | GGLHEFADSQ |
| 619                 | AARITSENP  | EGFKPSSGT  | QELNFRSSKN | VWGYFSVAAS | GGLHEFADSQ |
|                     |            |            |            |            |            |
|                     | 551        |            |            |            | 600        |
| BEMITA_QJQ31013     | FGHCFSWGEN | REQARENLVI | ALKELSIRGD | FRTTVEYLIT | LLETESFQIN |
| MYZUPE_XP_022181497 | FGHCFSWGEN | REQARENLVI | ALKELSIRGD | FRTTVEYLIT | LLETESFQSN |
| TRIAVA_ACCase       | FGHCFSWGEN | REQARENLVI | ALKELSIRGD | FRTTVEYLIT | LLETESFQIN |
| 2200                | FGHCFSWGEN | REQARENLVI | ALKELSIRGD | FRTTVEYLIT | LLETESFQIN |
| 319                 | FGHCFSWGEN | REQARENLVI | ALKELSIRGD | FRTTVEYLIT | LLETESFQIN |
| 419                 | FGHCFSWGEN | REQARENLVI | ALKELSIRGD | FRTTVEYLIT | LLETESFQIN |
| 520                 | FGHCFSWGEN | REQARENLVI | ALKELSIRGD | FRTTVEYLIT | LLETESFQIN |
| 619                 | FGHCFSWGEN | REQARENLVI | ALKELSIRGD | FRTTVEYLIT | LLETESFQIN |
|                     |            |            |            |            |            |
|                     | 601        |            |            |            | 650        |
| BEMITA_QJQ31013     | TIDTAWLDVL | IAEKVQSEKP | DILLGVMCGA | LHIADRRVTD | AFQNFQTSLE |
| MYZUPE_XP_022181497 | TIDTAWLDLL | ISERVQSEKP | DIFLGVICGG | LHIADRKISE | SFQNFQTSLE |
| TRIAVA_ACCase       | TIDTAWLDVL | IAQKVPSEKP | DILLGVMCGA | LHIADRKVTD | AFQNFQTSLE |
| 2200                | TIDTAWLDLL | ISERVQSEKP | DVLLGVMCGA | LHIADRKVCD | AFQNFQTSLE |
| 319                 | TIDTAWLDLL | ISERVQSEKP | DVLLGVMCGA | LHIADRKVCD | AFQNFQTSLE |
| 419                 | TIDTAWLDLL | ISERVQSEKP | DVLLGVMCGA | LHIADRKVCD | AFQNFQTSLE |
| 520                 | TIDTAWLDLL | ISERVQSEKP | DVLLGVMCGA | LHIADRKVCD | AFQNFQTSLE |
| 619                 | TIDTAWLDLL | ISERVQSEKP | DVLLGVMCGA | LHIADRKVCD | AFQNFQTSLE |
|                     |            |            |            |            |            |
|                     | 651        |            |            |            | 700        |
| BEMITA_QJQ31013     | RGQIQGSNTL | DHNVQVELIN | DGLKYKVHAT | KSGPNSYFLV | MNGSFKEIEL |
| MYZUPE_XP_022181497 | RGQVLSANTL | DHHVSVELIN | GGYKYKVQVT | KSGLNSYFLI | MNGSFKEIEV |
| TRIAVA_ACCase       | RGQIQGSNTL | DHHLSVELIH | DGLKYRVHAT | KSGANSYFLV | MNGSFKEIEL |
| 2200                | RGQIQGCNTL | DHNVQVELIH | DGLKYKVHAT | KSGLNSYFLV | MNGSFKEIEL |
| 319                 | RGQIQGCNTL | DHNVQVELIH | DGLKYKVHAT | KSGLNSYFLV | MNGSFKEIEL |
| 419                 | RGQIQGCNTL | DHNVQVELIH | DGLKYKVHAT | KSGLNSYFLV | MNGSFKEIEL |
| 520                 | RGQIQGCNTL | DHNVQVELIH | DGLKYKVHAT | KSGLNSYFLV | MNGSFKEIEL |
| 619                 | RGQIQGCNTL | DHNVQVELIH | DGLKYKVHAT | KSGLNSYFLV | MNGSFKEIEL |
|                     |            |            |            |            |            |
|                     | 701        |            |            |            | 750        |
| BEMITA_QJQ31013     | HRLSDGGILL | SVDSSSFTTY | MREEVDYRI  | VIGNQTCVFE | KENDPSLLRS |
| MYZUPE_XP_022181497 | HRLSDGGILL | SLDGSSFTTY | MREEVDYRI  | VIGNQTCVFD | KENDPSLFRS |
| TRIAVA_ACCase       | HRLSDG.... | .....      | ...EVDYRI  | VIGNQTCVFE | KENDPSLLRS |
| 2200                | HRLSDGGILL | SVDGSSFTTY | MREEVDYRI  | VIGNLTCVFE | KENDPSLLRS |
| 319                 | HRLSDGGILL | SVDGSSFTTY | MREEVDYRI  | VIGNLTCVFE | KENDPSLLRS |
| 419                 | HRLSDGGILL | SVDGSSFTTY | MREEVDYRI  | VIGNLTCVFE | KENDPSLLRS |
| 520                 | HRLSDGGILL | SVDGSSFTTY | MREEVDYRI  | VIGNLTCVFE | KENDPSLLRS |
| 619                 | HRLSDGGILL | SVDGSSFTTY | MREEVDYRI  | VIGNLTCVFE | KENDPSLLRS |
|                     |            |            |            |            |            |
|                     | 751        |            |            |            | 800        |
| BEMITA_QJQ31013     | PSAGKLLSFL | IEDGGHVSKG | QAYAEIEVMK | MVMTLTASEN | GNVTFAKRPG |
| MYZUPE_XP_022181497 | PSAGKLISFL | IEDGGQVKKG | QPYAEIEVMK | MVMTLTATEN | GRVYYSKRPG |
| TRIAVA_ACCase       | PSAGKLISFL | IEDGGHVAKG | AAYAEIEVMK | MVMTLTANES | GLVTFAKRPG |
| 2200                | PSAGKLISYL | IEDGGHVSKG | QAYAEIEVMK | MVMTLTANES | GLVTFAKRPG |
| 319                 | PSAGKLISYL | IEDGGHVSKG | QAYAEIEVMK | MVMTLTANES | GLVTFAKRPG |
| 419                 | PSAGKLISYL | IEDGGHVSKG | QAYAEIEVMK | MVMTLTANES | GLVTFAKRPG |
| 520                 | PSAGKLISYL | IEDGGHVSKG | QAYAEIEVMK | MVMTLTANES | GLVTFAKRPG |
| 619                 | PSAGKLISYL | IEDGGHVSKG | QAYAEIEVMK | MVMTLTANES | GLVTFAKRPG |
|                     |            |            |            |            |            |
|                     | 801        |            |            |            | 850        |
| BEMITA_QJQ31013     | AVLDAGSLIA | TLEDDPSLV  | TKALDYKGQF | PELDVSTPTV | GEKLNHAHNH |
| MYZUPE_XP_022181497 | AVLDAGSLIA | TLEDDPSLV  | TKAIEYKGQF | LELDGTSIHY | GESLNNIHTC |
| TRIAVA_ACCase       | AVLDAGSLIA | TLEDDISLV  | TKALDYKGQF | PELDVSTPMV | GDKLNHAHNH |
| 2200                | AVLDAGSLIG | TLEDDPSLV  | SKALDYKGEF | PELDVSTPMV | GEKLNHAHNH |
| 319                 | AVLDAGSLIG | TLEDDPSLV  | SKALDYKGEF | PELDVSTPMV | GEKLNHAHNH |

|                     |             |            |            |             |             |
|---------------------|-------------|------------|------------|-------------|-------------|
| 419                 | AVLDAGSLIG  | TLELDDPSLV | SKALDYKGEF | PELDVSTPMV  | GEKLNHAHNNH |
| 520                 | AVLDAGSLIG  | TLELDDPSLV | SKALDYKGEF | PELDVSTPMV  | GEKLNHAHNNH |
| 619                 | AVLDAGSLIG  | TLELDDPSLV | SKALDYKGEF | PELDVSTPMV  | GEKLNHAHNNH |
|                     |             |            |            |             |             |
|                     | 851         |            |            |             | 900         |
| BEMITA_QJQ31013     | YRQMLDNILA  | GYCLDPYHL  | VRLREVIEKF | MSSLRDPSLP  | LLELQEVISS  |
| MYZUPE_XP_022181497 | YRQMLDNILA  | GYCLPEPYHL | VRLREVIEKF | MNSLRDPSLP  | LLELQEVISS  |
| TRIAVA_ACCase       | YRQMLDNILA  | GYCLDPYHL  | VRLREVIEKF | MSSLRDPSLP  | LLELQEVISS  |
| 2200                | YRQMLDNILA  | GFCLDPYHL  | VRLREVIEKF | MSSLRDPSLP  | LLELQEVISS  |
| 319                 | YRQMLDNILA  | GFCLDPYHL  | VRLREVIEKF | MSSLRDPSLP  | LLELQEVISS  |
| 419                 | YRQMLDNILA  | GFCLDPYHL  | VRLREVIEKF | MSSLRDPSLP  | LLELQEVISS  |
| 520                 | YRQMLDNILA  | GFCLDPYHL  | VRLREVIEKF | MSSLRDPSLP  | LLELQEVISS  |
| 619                 | YRQMLDNILA  | GFCLDPYHL  | VRLREVIEKF | MSSLRDPSLP  | LLELQEVISS  |
|                     |             |            |            |             |             |
|                     | 901         |            |            |             | 950         |
| BEMITA_QJQ31013     | ISGRIPISVE  | KKIRKLMTRY | ERNITSVLAQ | FPSQQIASVI  | DSHAATLQKR  |
| MYZUPE_XP_022181497 | ISGRIPKAVD  | KKIKSLMKLY | ERNITSVLAQ | FPSQQIAAII  | DGHAATLQKR  |
| TRIAVA_ACCase       | ISGRIPISVE  | KKIRKLMTRY | ERNITSVLAQ | FPSQQIASVI  | DSHAATLQKR  |
| 2200                | ISGRIPISVE  | KKIRKLMTRY | ERNITSVLAQ | FPSQQIAGVI  | DSHAATLQKR  |
| 319                 | ISGRIPISVE  | KKIRKLMTRY | ERNITSVLAQ | FPSQQIAGVI  | DSHAATLQKR  |
| 419                 | ISGRIPISVE  | KKIRKLMTRY | ERNITSVLAQ | FPSQQIAGVI  | DSHAATLQKR  |
| 520                 | ISGRIPISVE  | KKIRKLMTRY | ERNITSVLAQ | FPSQQIAGVI  | DSHAATLQKR  |
| 619                 | ISGRIPISVE  | KKIRKLMTRY | ERNITSVLAQ | FPSQQIAGVI  | DSHAATLQKR  |
|                     |             |            |            |             |             |
|                     | 951         |            |            |             | 1000        |
| BEMITA_QJQ31013     | SDRDGFFLTT  | QGIVQLVQRY | RNGIRGRMKS | AVHELLRQYY  | EVESQFQQGH  |
| MYZUPE_XP_022181497 | TDRDSFFQTT  | QGIVQLVQRY | RNGIRGRMKS | AVHELLKQYY  | EVESQFQHGS  |
| TRIAVA_ACCase       | SDRDGFFLTT  | QGIVQLVQRY | RNGIRGRMKS | AVHELLRQYY  | EVESQFQQGH  |
| 2200                | SDRDGFFLTT  | QGIVQLVQRY | RNGIRGRMKS | AVHELLRQYY  | EVESQFQQGH  |
| 319                 | SDRDGFFLTT  | QGIVQLVQRY | RNGIRGRMKS | AVHELLRQYY  | EVESQFQQGH  |
| 419                 | SDRDGFFLTT  | QGIVQLVQRY | RNGIRGRMKS | AVHELLRQYY  | EVESQFQQGH  |
| 520                 | SDRDGFFLTT  | QGIVQLVQRY | RNGIRGRMKS | AVHELLRQYY  | EVESQFQQGH  |
| 619                 | SDRDGFFLTT  | QGIVQLVQRY | RNGIRGRMKS | AVHELLRQYY  | EVESQFQQGH  |
|                     |             |            |            |             |             |
|                     | 1001        |            |            |             | 1050        |
| BEMITA_QJQ31013     | YDKCVTAIRE  | KFKDDMAAVT | GTIFSHGQVA | KKNMLVTMLI  | DHLWSNEPGL  |
| MYZUPE_XP_022181497 | YDKCATALRD  | RYKDDMAAVT | STIFSHTQVA | KKNMLVTMLI  | DHLWSNEPGL  |
| TRIAVA_ACCase       | YDKCVTAIRE  | KFKDDMAAVV | GTIFSHGQVA | KKNMLVTMLI  | DHLWSNEPGL  |
| 2200                | YDKCVMAIRE  | KFKDDMAAVT | STIFSHGQVA | KKNMLVTMLI  | DHLWSNEPGL  |
| 319                 | YDKCVMAIRE  | KFKDDMAAVT | STIFSHGQVA | KKNMLVTMLI  | DHLWSNEPGL  |
| 419                 | YDKCVMAIRE  | KFKDDMAAVT | STIFSHGQVA | KKNMLVTMLI  | DHLWSNEPGL  |
| 520                 | YDKCVMAIRE  | KFKDDMAAVT | STIFSHGQVA | KKNMLVTMLI  | DHLWSNEPGL  |
| 619                 | YDKCVMAIRE  | KFKDDMAAVT | STIFSHGQVA | KKNMLVTMLI  | DHLWSNEPGL  |
|                     |             |            |            |             |             |
|                     | 1051        |            |            |             | 1100        |
| BEMITA_QJQ31013     | TDELATTLINE | LTSLNRSEHS | RVALRARQVL | IAAHQPAYEL  | RHNQMESIFL  |
| MYZUPE_XP_022181497 | TDELAATLINE | LTSLNRSEHS | RVALRARQVL | IAAHQPAYEL  | RHNQMESIFL  |
| TRIAVA_ACCase       | TDELATTLINE | LTSLNRSEHS | RVALRARQVL | IAAHQPAYEL  | RHNQMESIFL  |
| 2200                | TDELATTLINE | LTSLNRSEHS | RVALRSRQVL | IAAHQPAYEL  | RHNQMESIFL  |
| 319                 | TDELATTLINE | LTSLNRSEHS | RVALRSRQVL | IAAHQPAYEL  | RHNQMESIFL  |
| 419                 | TDELATTLINE | LTSLNRSEHS | RVALRSRQVL | IAAHQPAYEL  | RHNQMESIFL  |
| 520                 | TDELATTLINE | LTSLNRSEHS | RVALRSRQVL | IAAHQPAYEL  | RHNQMESIFL  |
| 619                 | TDELATTLINE | LTSLNRSEHS | RVALRSRQVL | IAAHQPAYEL  | RHNQMESIFL  |
|                     |             |            |            |             |             |
|                     | 1101        |            |            |             | 1150        |
| BEMITA_QJQ31013     | SAVDMYGHDF  | HPENLQKLIQ | SETSIFDILH | DDFFYHTNRAV | CNAALEVYVR  |
| MYZUPE_XP_022181497 | SAVDMYGHDF  | HPENLQKLIQ | SETSIFDILH | DDFFYHSNRAV | CNAALEVYVR  |
| TRIAVA_ACCase       | SAVDMYGHDF  | HPENLQKLIQ | SETSIFDILH | DDFFYHTNRAV | CNAALEVYVR  |
| 2200                | SAVDMYGHDF  | HPENLQKLIQ | SETSIFDILH | DDFFYHTNRAV | CNAALEVYVR  |

|                     |            |             |            |            |             |
|---------------------|------------|-------------|------------|------------|-------------|
| 319                 | SAVDMYGHDF | HPENLQKLIQ  | SETSIFDILH | DDFYHTNRAV | CNAALEVYVR  |
| 419                 | SAVDMYGHDF | HPENLQKLIQ  | SETSIFDILH | DDFYHTNRAV | CNAALEVYVR  |
| 520                 | SAVDMYGHDF | HPENLQKLIQ  | SETSIFDILH | DDFYHTNRAV | CNAALEVYVR  |
| 619                 | SAVDMYGHDF | HPENLQKLIQ  | SETSIFDILH | DDFYHTNRAV | CNAALEVYVR  |
|                     |            |             |            |            |             |
|                     | 1151       |             |            |            | 1200        |
| BEMITA_QJQ31013     | RVYISYELTC | LKHLELTEEV  | PLVQFQFLLP | SSHPNRQVRV | DSASPGRDAP  |
| MYZUPE_XP_022181497 | RVYISYDLTC | LQHLELSGEI  | PLVHFQFLLP | SSHPNRQQNK | INSGAN...G  |
| TRIAVA_ACCase       | RVYISYDLTC | LQHLELSGEI  | PLVQFQFLLP | SSHPNRQKVT | DSSPIKADTP  |
| 2200                | RVYISYELTC | LQHLELSGEV  | PLVQFQFLLP | SSHPNRQKVT | DPSSPIIAD.  |
| 319                 | RVYISYELTC | LQHLELSGEV  | PLVQFQFLLP | SSHPNRQKVT | DPSSPIIAD.  |
| 419                 | RVYISYELTC | LQHLELSGEV  | PLVQFQFLLP | SSHPNRQKVT | DPSSPIIAD.  |
| 520                 | RVYISYELTC | LQHLELSGEV  | PLVQFQFLLP | SSHPNRQKVT | DPSSPIIAD.  |
| 619                 | RVYISYELTC | LQHLELSGEV  | PLVQFQFLLP | SSHPNRQKVT | DPSSPIIAD.  |
|                     |            |             |            |            |             |
|                     | 1201       |             |            |            | 1250        |
| BEMITA_QJQ31013     | ..ETDMTASA | APTVIHSYQR  | TGCMAAFESF | DQFESYYDEI | LDLLDEL.SP  |
| MYZUPE_XP_022181497 | SENLESPKT  | PLPYIPTYQR  | TGCMAAFESF | TQFEQYFDEI | LDIMEDLSSP  |
| TRIAVA_ACCase       | PPEIEAGQSS | APTIIHSYQR  | TGCMAAFESF | DQFESYYDEI | LDLLDDLMS   |
| 2200                | SPETEEPPSS | TPTIIHSYQR  | TGCMAAFESF | DQFESYYDEI | LDLLDEL.SP  |
| 319                 | SPETEEPPSS | TPTIIHSYQR  | TGCMAAFESF | DQFESYYDEI | LDLLDEL.SP  |
| 419                 | SPETEEPPSS | TPTIIHSYQR  | TGCMAAFESF | DQFESYYDEI | LDLLDEL.SP  |
| 520                 | SPETEEPPSS | TPTIIHSYQR  | TGCMAAFESF | DQFESYYDEI | LDLLDEL.SP  |
| 619                 | SPETEEPPSS | TPTIIHSYQR  | TGCMAAFESF | DQFESYYDEI | LDLLDEL.SP  |
|                     |            |             |            |            |             |
|                     | 1251       |             |            |            | 1300        |
| BEMITA_QJQ31013     | STVSPRIMEA | LESGSES RMS | TSINVSLSD  | .TORPAGGEE | GLQVEPIHIL  |
| MYZUPE_XP_022181497 | VYVSPRIIDA | LESGSESRLS  | SSLNVSLSLG | DQRPPD..QE | NVEIEPCHIL  |
| TRIAVA_ACCase       | STVSPRIMEA | LESGSES RMS | TSINVSLSVS | DNPRPPGLEE | GLQVEPIHIL  |
| 2200                | STISPRIMEA | LESGSES RMS | TSINVSLSVG | DNPRPPGLED | GLQVEPIHIL  |
| 319                 | STISPRIMEA | LESGSES RMS | TSINVSLSVG | DNPRPPGLED | GLQVEPIHIL  |
| 419                 | STISPRIMEA | LESGSES RMS | TSINVSLSVG | DNPRPPGLED | GLQVEPIHIL  |
| 520                 | STISPRIMEA | LESGSES RMS | TSINVSLSVG | DNPRPPGLED | GLQVEPIHIL  |
| 619                 | STISPRIMEA | LESGSES RMS | TSINVSLSVG | DNPRPPGLED | GLQVEPIHIL  |
|                     |            |             |            |            |             |
|                     | 1301       |             |            |            | 1350        |
| BEMITA_QJQ31013     | CIAVKDNGDL | EDDKLSKMF   | DFCAKNRDEL | KEKSIRRITF | LALNRRQFPK  |
| MYZUPE_XP_022181497 | CIAMKDTGNM | EDDKLGKMYE  | EFCQRRREEL | KKRSIRRITF | LALNRRQFPK  |
| TRIAVA_ACCase       | CIAVKDNGDL | EDDKLSKLLG  | DFCARHRDEL | KEKSIRRITF | LALNRRQFPK  |
| 2200                | CIAVKDNGDL | EDEKLSKLLG  | DFCAKHREEL | KEKSIRRITF | LALNRRQFPK  |
| 319                 | CIAVKDNGDL | EDEKLSKLLG  | DFCAKHREEL | KEKSIRRITF | LALNRRQFPK  |
| 419                 | CIAVKDNGDL | EDEKLSKLLG  | DFCAKHREEL | KEKSIRRITF | LALNRRQFPK  |
| 520                 | CIAVKDNGDL | EDEKLSKLLG  | DFCAKHREEL | KEKSIRRITF | LALNRRQFPK  |
| 619                 | CIAVKDNGDL | EDEKLSKLLG  | DFCAKHREEL | KEKSIRRITF | LALNRRQFPK  |
|                     |            |             |            |            |             |
|                     | 1351       |             |            |            | 1400        |
| BEMITA_QJQ31013     | LFTFRNCDNF | VEDRIYRHLE  | PGMAFQLELN | RMKTYHLEAL | PTSNRKMYLY  |
| MYZUPE_XP_022181497 | LFTYRNYEDF | AEDRIYRHLE  | PGMAFQLELN | RMRTYELEAL | PTSNRKMYLY  |
| TRIAVA_ACCase       | LFTFRNCDNF | VEDRIYRHLE  | PGMAFQLELN | RMKTYHLEAL | PTSNRKMYLY  |
| 2200                | LFTFRNCDNF | VEDRIYRHLE  | PGMAFQLELN | RMKTYHLEAL | PTSNRKMYLY  |
| 319                 | LFTFRNCDNF | VEDRIYRHLE  | PGMAFQLELN | RMKTYHLEAL | PTSNRKMYLY  |
| 419                 | LFTFRNCDNF | VEDRIYRHLE  | PGMAFQLELN | RMKTYHLEAL | PTSNRKMYLY  |
| 520                 | LFTFRNCDNF | VEDRIYRHLE  | PGMAFQLELN | RMKTYHLEAL | PTSNRKMYLY  |
| 619                 | LFTFRNCDNF | VEDRIYRHLE  | PGMAFQLELN | RMKTYHLEAL | PTSNRKMYLY  |
|                     |            |             |            |            |             |
|                     | 1401       |             |            |            | 1450        |
| BEMITA_QJQ31013     | LGKAKVAKGQ | EVTDYRFFIR  | SIIRHSDLIT | KEASFEYLQN | EGERVLLLEAM |
| MYZUPE_XP_022181497 | LGKAKVPRGQ | VVTDYRFFIR  | SIIRHQDLIT | KEASFEYLQN | EGERVLLLEAM |
| TRIAVA_ACCase       | LGKAKVAKGQ | EVTDYRFFIR  | SIIRHSDLIT | KEASFEYLQN | EGERVLLLEAM |

|                     |            |             |             |             |             |
|---------------------|------------|-------------|-------------|-------------|-------------|
| 2200                | LGRAKVAKGQ | EVTDFRFFIR  | SIIRHSDLIT  | KEASFEYLQN  | EGERVLLLEAM |
| 319                 | LGRAKVAKGQ | EVTDFRFFIR  | SIIRHSDLIT  | KEASFEYLQN  | EGERVLLLEAM |
| 419                 | LGRAKVAKGQ | EVTDFRFFIR  | SIIRHSDLIT  | KEASFEYLQN  | EGERVLLLEAM |
| 520                 | LGRAKVAKGQ | EVTDFRFFIR  | SIIRHSDLIT  | KEASFEYLQN  | EGERVLLLEAM |
| 619                 | LGRAKVAKGQ | EVTDFRFFIR  | SIIRHSDLIT  | KEASFEYLQN  | EGERVLLLEAM |
|                     |            |             |             |             |             |
|                     | 1451       |             |             | 1500        |             |
| BEMITA_QJQ31013     | DELEVAFSHP | LAKRTDCNHI  | FLNFVPTVIM  | DSAKIEESVT  | NMVMRYGPRL  |
| MYZUPE_XP_022181497 | DELEVAFSHP | HARRTDCNHI  | FLNFVPTVIM  | DPAKIKESVT  | NMVMRYGPRL  |
| TRIAVA_ACCase       | DELEVAFSHP | LAKRTDCNHI  | FLNFVPTVIM  | DSAKIEESVT  | NMVMRYGPRL  |
| 2200                | DELEVAFSHP | LARRTDCNHI  | FLNFVPTVIM  | DSAKIEESVT  | NMVMRYGARL  |
| 319                 | DELEVAFSHP | LARRTDCNHI  | FLNFVPTVIM  | DSAKIEESVT  | NMVMRYGARL  |
| 419                 | DELEVAFSHP | LARRTDCNHI  | FLNFVPTVIM  | DSAKIEESVT  | NMVMRYGARL  |
| 520                 | DELEVAFSHP | LARRTDCNHI  | FLNFVPTVIM  | DSAKIEESVT  | NMVMRYGARL  |
| 619                 | DELEVAFSHP | LARRTDCNHI  | FLNFVPTVIM  | DSAKIEESVT  | NMVMRYGARL  |
|                     |            |             |             |             |             |
|                     | 1501       |             |             | 1550        |             |
| BEMITA_QJQ31013     | WKLRLVQAEL | RMTIRASPNA  | KTTNVRLCLA  | NDSGYLDIC   | LYKEVDPKT   |
| MYZUPE_XP_022181497 | WKLRLVQAEL | RMTIRPSPTS  | KTSNVRLSLA  | NGSGYHLDIC  | LYKEITDSKL  |
| TRIAVA_ACCase       | WKLRLVQAEL | RMTIRASPNS  | KTTNVRLCLA  | NDSGYLDIC   | LYKEVDPKT   |
| 2200                | WKLRLVQAEL | RMTIRTSPNS  | KTTNVRLCLA  | NDSGYLDIC   | LYKEVDPKT   |
| 319                 | WKLRLVQAEL | RMTIRTSPNS  | KTTNVRLCLA  | NDSGYLDIC   | LYKEVDPKT   |
| 419                 | WKLRLVQAEL | RMTIRTSPNS  | KTTNVRLCLA  | NDSGYLDIC   | LYKEVDPKT   |
| 520                 | WKLRLVQAEL | RMTIRTSPNS  | KTTNVRLCLA  | NDSGYLDIC   | LYKEVDPKT   |
| 619                 | WKLRLVQAEL | RMTIRTSPNS  | KTTNVRLCLA  | NDSGYLDIC   | LYKEVDPKT   |
|                     |            |             |             |             |             |
|                     | 1551       |             |             | 1600        |             |
| BEMITA_QJQ31013     | GIKLESYGS  | KQGPHGLPV   | ATPYVTKDYL  | QQKRFQAQSA  | GTTYCHDIPD  |
| MYZUPE_XP_022181497 | GMIKFESYES | KQGPHGLPV   | STPYVTKDFL  | QQKRFQAQSA  | GTTYVVDIPD  |
| TRIAVA_ACCase       | GIKLESYGS  | KQGPVHGLPV  | SLPYVTKDYL  | QQKRFQAQSA  | GTTYCHDIPD  |
| 2200                | GIKLESYGS  | KQGPHGLPT   | AIPYVTKDYL  | QQKRFQAQSA  | GTTYCHDIPD  |
| 319                 | GIKLESYGS  | KQGPHGLPT   | AIPYVTKDYL  | QQKRFQAQSA  | GTTYCHDIPD  |
| 419                 | GIKLESYGS  | KQGPHGLPT   | AIPYVTKDYL  | QQKRFQAQSA  | GTTYCHDIPD  |
| 520                 | GIKLESYGS  | KQGPHGLPT   | AIPYVTKDYL  | QQKRFQAQSA  | GTTYCHDIPD  |
| 619                 | GIKLESYGS  | KQGPHGLPT   | AIPYVTKDYL  | QQKRFQAQSA  | GTTYCHDIPD  |
|                     |            |             |             |             |             |
|                     | 1601       |             |             | 1650        |             |
| BEMITA_QJQ31013     | MFRQMVERQW | KEHIDQRPDD  | GIVKPAQLMD  | FAELVLEEDH  | LVEQKRLPGE  |
| MYZUPE_XP_022181497 | MFRQMIETLW | QEYILEHPND  | GVLKSSLVFD  | YVELVVEDNH  | LIEQKRFSGE  |
| TRIAVA_ACCase       | MFRQMVERQW | KEHIEQRPND  | GIVKPSQLMD  | FVELVMEEDH  | LIEVKRLSGE  |
| 2200                | MFRQMVERQW | KEFIEQRPND  | GIVKPSQLMD  | YVELVLEDDH  | LVEQKRLAGE  |
| 319                 | MFRQMVERQW | KEFIEQRPND  | GIVKPSQLMD  | YVELVLEDDH  | LVEQKRLAGE  |
| 419                 | MFRQMVERQW | KEFIEQRPND  | GIVKPSQLMD  | YVELVLEDDH  | LVEQKRLAGE  |
| 520                 | MFRQMVERQW | KEFIEQRPND  | GIVKPSQLMD  | YVELVLEDDH  | LVEQKRLAGE  |
| 619                 | MFRQMVERQW | KEFIEQRPND  | GIVKPSQLMD  | YVELVLEDDH  | LVEQKRLAGE  |
|                     |            |             |             |             |             |
|                     | 1651       |             |             | 1700        |             |
| BEMITA_QJQ31013     | NNVGMVAWRI | TLNTPEYPDG  | RDIIIVIANDI | TVRIGSFGPE  | EDLVFDLASK  |
| MYZUPE_XP_022181497 | NTAGMVAWRF | TMHTPEYPSG  | RDIIIVIANDL | TVNIGSFGPQ  | EDIVFDLASK  |
| TRIAVA_ACCase       | NNVGMVAWRI | TLNTPEYPDG  | RDIIIVIANDI | TVRIGSFGPE  | EDIVFDLASK  |
| 2200                | NTIGMVAWRI | TLNTPEYPDG  | REIIVIANDI  | TVRIGSFGPE  | EDLVFDLASK  |
| 319                 | NTIGMVAWRI | TLNTPEYPDG  | REIIVIANDI  | TVRIGSFGPE  | EDLVFDLASK  |
| 419                 | NTIGMVAWRI | TLNTPEYPDG  | REIIVIANDI  | TVRIGSFGPE  | EDLVFDLASK  |
| 520                 | NTIGMVAWRI | TLNTPEYPDG  | REIIVIANDI  | TVRIGSFGPE  | EDLVFDLASK  |
| 619                 | NTIGMVAWRI | TLNTPEYPDG  | REIIVIANDI  | TVRIGSFGPE  | EDLVFDLASK  |
|                     |            |             |             |             |             |
|                     | 1701       |             |             | 1750        |             |
| BEMITA_QJQ31013     | IARQRKIPRI | YIAANS GARI | GLAE EVKSLF | RV AWEDPDEP | DKGFKYLYLS  |
| MYZUPE_XP_022181497 | EARRKKIPRI | YISANS GARI | GLAE EIKSLF | NV AWEDPSDP | EKGFKYLYLT  |

|                     |            |            |            |            |             |
|---------------------|------------|------------|------------|------------|-------------|
| TRIAVA_ACCase       | IARARKIPRI | YIAANSGARI | GLAEVKSFL  | RVAWEDPDEP | DKGFKYLYLS  |
| 2200                | IARQMKVPRI | YIAANSGARI | GLAEVKSFL  | RVAWEDPDEP | DKGLKYLYLS  |
| 319                 | IARQMKVPRI | YIAANSGARI | GLAEVKSFL  | RVAWEDPDEP | DKGLKYLYLS  |
| 419                 | IARQMKVPRI | YIAANSGARI | GLAEVKSFL  | RVAWEDPDEP | DKGLKYLYLS  |
| 520                 | IARQMKVPRI | YIAANSGARI | GLAEVKSFL  | RVAWEDPDEP | DKGLKYLYLS  |
| 619                 | IARQMKVPRI | YIAANSGARI | GLAEVKSFL  | RVAWEDPDEP | DKGLKYLYLS  |
|                     |            |            |            |            |             |
| BEMITA_QJQ31013     | TEDFTKISSC | NSVHAILIED | EGEARYKITD | IIGKEDGLGV | ENLRYAGMIA  |
| MYZUPE_XP_022181497 | PDDYGKLAGQ | NSVEAELIED | EGEPYKLT   | IIGKDFGYGV | ENLKFAGMIA  |
| TRIAVA_ACCase       | TEDFTKISSL | NSVHAILIED | EGEARYKITD | IIGKEDGLGV | ENLRYAGMIA  |
| 2200                | TEDFIKISAC | NSVRAILIED | EGEARYKITD | IIGKEDGLGV | ENLRYAGMIA  |
| 319                 | TEDFIKISAC | NSVRAILIED | EGEARYKITD | IIGKEDGLGV | ENLRYAGMIA  |
| 419                 | TEDFIKISAC | NSVRAILIED | EGEARYKITD | IIGKEDGLGV | ENLRYAGMIA  |
| 520                 | TEDFIKISAC | NSVRAILIED | EGEARYKITD | IIGKEDGLGV | ENLRYAGMIA  |
| 619                 | TEDFIKISAC | NSVRAILIED | EGEARYKITD | IIGKEDGLGV | ENLRYAGMIA  |
|                     |            |            |            |            |             |
| BEMITA_QJQ31013     | GETSEAYREI | VTISMVSCRA | IGIGAYLVRL | GQRVIQVENS | HIILTGYSAL  |
| MYZUPE_XP_022181497 | GETSRAYQDI | VTISMVTCRA | IGIGAYLVRL | GQRVIQIENS | HIILTGYSAL  |
| TRIAVA_ACCase       | GETSEAYREI | VTISMVSCRA | IGIGAYLVRL | GQRVIQVENS | HIILTGYSAL  |
| 2200                | GETSEAYREI | VTISMVSCRA | IGIGAYLVRL | GQRVIQVENS | HIILTGYSAL  |
| 319                 | GETSEAYREI | VTISMVSCRA | IGIGAYLVRL | GQRVIQVENS | HIILTGYSAL  |
| 419                 | GETSEAYREI | VTISMVSCRA | IGIGAYLVRL | GQRVIQVENS | HIILTGYSAL  |
| 520                 | GETSEAYREI | VTISMVSCRA | IGIGAYLVRL | GQRVIQVENS | HIILTGYSAL  |
| 619                 | GETSEAYREI | VTISMVSCRA | IGIGAYLVRL | GQRVIQVENS | HIILTGYSAL  |
|                     |            |            |            |            |             |
| BEMITA_QJQ31013     | NKLLGREVYA | SNNQLGGIQI | MYNNGVSHKT | EPRDLGDIYS | IVKWL SYIPK |
| MYZUPE_XP_022181497 | NKLLGREVYA | SNNQLGGIQI | MYNNGVSHKT | EARDLDGVYR | ILKWL SYIPK |
| TRIAVA_ACCase       | NKLLGREVYA | SNNQLGGIQI | MHNNGVSHKT | EPRDLGDIYS | IVKWLAFVPK  |
| 2200                | NKLLGREVYA | SNNQLGGIQI | MYNNGISHKT | EPRDLGDIYS | IVKWLGYIPK  |
| 319                 | NKLLGREVYA | SNNQLGGIQI | MYNNGISHKT | EPRDLGDIYS | IVKWLGYIPK  |
| 419                 | NKLLGREVYA | SNNQLGGIQI | MYNNGISHKT | EPRDLGDIYS | IVKWLGYIPK  |
| 520                 | NKLLGREVYA | SNNQLGGIQI | MYNNGISHKT | EPRDLGDIYS | IVKWLGYIPK  |
| 619                 | NKLLGREVYA | SNNQLGGIQI | MYNNGISHKT | EPRDLGDIYS | IVKWLGYIPK  |
|                     |            |            |            |            |             |
| BEMITA_QJQ31013     | DKLSPVPVIK | PADPIDREVG | YMPTKTPYDP | RWMLAGRYSP | .NNSNEWESG  |
| MYZUPE_XP_022181497 | TKESPLPVIK | SVDSVERDID | YVPTKVPYDP | RWMIAGKE.. | .DTNGHWESG  |
| TRIAVA_ACCase       | DKMSPVPVLK | PADPVDREVG | YMPTKTPYDP | RWMLAGHFSF | LDSSNEWESG  |
| 2200                | DKYSPVPVIK | PADPVDREVG | YMPTKTPYDP | RWMIAGRYSP | .NNSNEWESG  |
| 319                 | DKYSPVPVIK | PADPVDREVG | YMPTKTPYDP | RWMIAGRYSP | .NNSNEWESG  |
| 419                 | DKYSPVPVIK | PADPVDREVG | YMPTKTPYDP | RWMIAGRYSP | .NNSNEWESG  |
| 520                 | DKYSPVPVIK | PADPVDREVG | YMPTKTPYDP | RWMIAGRYSP | .NNSNEWESG  |
| 619                 | DKYSPVPVIK | PADPVDREVG | YMPTKTPYDP | RWMIAGRYSP | .NNSNEWESG  |
|                     |            |            |            |            |             |
| BEMITA_QJQ31013     | FFDEGSWEEV | MQPWAQTVVV | GRARLGGIPM | GVIAVETRTV | EVKLPADPAN  |
| MYZUPE_XP_022181497 | FFDKGSWDEI | MQPWAQTVVC | GRARLGGIPV | GVIAVETRTV | EVTLPADPAN  |
| TRIAVA_ACCase       | FFDEGTWEEV | MQPWAQTVVV | GRARLGGIPM | GVIAVETRTV | ELKWPADPAN  |
| 2200                | FFDEGSWEEV | MQPWAQTVVV | GRARLGGIPM | GVIAVETRTV | EVKLPADPAN  |
| 319                 | FFDEGSWEEV | MQPWAQTVVV | GRARLGGIPM | GVIAVETRTV | EVKLPADPAN  |
| 419                 | FFDEGSWEEV | MQPWAQTVVV | GRARLGGIPM | GVIAVETRTV | EVKLPADPAN  |
| 520                 | FFDEGSWEEV | MQPWAQTVVV | GRARLGGIPM | GVIAVETRTV | EVKLPADPAN  |
| 619                 | FFDEGSWEEV | MQPWAQTVVV | GRARLGGIPM | GVIAVETRTV | EVKLPADPAN  |
|                     |            |            |            |            |             |
| BEMITA_QJQ31013     | LDSEAKTLSQ | AGQVWFPDSA | YKTAQAIKDF | EHEDLPLIIF | ANWRGFSGGM  |

|                     |            |            |            |            |            |
|---------------------|------------|------------|------------|------------|------------|
| MYZUPE_XP_022181497 | LDSEKTVSQ  | AGQVWFPDSA | YKTSQAIKDF | AHEDLPLFIF | ANWRGFSGGM |
| TRIAVA_ACCase       | LDSEAKTLSQ | AGQVWFPDSA | YKTAQAIKDF | QHEDLPLIIF | ANWRGFSGGM |
| 2200                | LDSEAKTLSQ | AGQVWFPDSA | FKTAQAIKDF | EHEDLPLIIF | ANWRGFSGGM |
| 319                 | LDSEAKTLSQ | AGQVWFPDSA | FKTAQAIKDF | EHEDLPLIIF | ANWRGFSGGM |
| 419                 | LDSEAKTLSQ | AGQVWFPDSA | FKTAQAIKDF | EHEDLPLIIF | ANWRGFSGGM |
| 520                 | LDSEAKTLSQ | AGQVWFPDSA | FKTAQAIKDF | EHEDLPLIIF | ANWRGFSGGM |
| 619                 | LDSEAKTLSQ | AGQVWFPDSA | FKTAQAIKDF | EHEDLPLIIF | ANWRGFSGGM |

|                     |            |            |            |             |
|---------------------|------------|------------|------------|-------------|
|                     | 2051       |            | A2083V     | 2100        |
| BEMITA_QJQ31013     | KDMYEQVMKF | GAYIVDELRV | YKQPVIIYIP | PNGELRGGAW  |
| MYZUPE_XP_022181497 | KDMYEQIMKF | GAYIVDELRL | YNQPIITYIP | PFGE LRGGAW |
| TRIAVA_ACCase       | KDMYEQVMKF | GAYIVDELRL | YKQPVIIYIP | PNGELRGGAW  |
| 2200                | KDMYEQVMKF | GAYIVDELRV | YKQPVIIYIP | PNGELRGGAW  |
| 319                 | KDMYEQVMKF | GAYIVDELRV | YKQPVIIYIP | PNGELRGGAW  |
| 419                 | KDMYEQVMKF | GAYIVDELRV | YKQPVIIYIP | PNGELRGGAW  |
| 520                 | KDMYEQVMKF | GAYIVDELRV | YKQPVIIYIP | PNGELRGGAW  |
| 619                 | KDMYEQVMKF | GAYIVDELRV | YKQPVIIYIP | PNGELRGGAW  |

|                     |            |            |            |            |
|---------------------|------------|------------|------------|------------|
|                     | 2101       |            |            | 2150       |
| BEMITA_QJQ31013     | HMEMYADPES | RGGVLEPEGI | VEIKFREKDI | LKTMHRIDQV |
| MYZUPE_XP_022181497 | HIEMYADPES | RGGVLEPEGI | VEIKFREKDI | LKSINRIDTN |
| TRIAVA_ACCase       | YMEMYADPES | RGGVLEPEGI | VEIKFREKDI | LKTMHRIDQI |
| 2200                | HMEMYADPES | RGGVLEPEGI | VEIKFREKDI | LKTMHRIDQV |
| 319                 | HMEMYADPES | RGGVLEPEGI | VEIKFREKDI | LKTMHRIDQV |
| 419                 | HMEMYADPES | RGGVLEPEGI | VEIKFREKDI | LKTMHRIDQV |
| 520                 | HMEMYADPES | RGGVLEPEGI | VEIKFREKDI | LKTMHRIDQV |
| 619                 | HMEMYADPES | RGGVLEPEGI | VEIKFREKDI | LKTMHRIDQV |

|                     |            |            |           |            |
|---------------------|------------|------------|-----------|------------|
|                     | 2151       |            |           | 2200       |
| BEMITA_QJQ31013     | TDISPEEKAD | VESRIVEREQ | YLKPMYHQA | VHFADLHDTF |
| MYZUPE_XP_022181497 | ASPTPEEA   | IEKNVAERIS | VLKPIYHQA | IHFADLHDTF |
| TRIAVA_ACCase       | PDISPEEKAE | VENQIVEREQ | YLKPMYHQA | VHFADLHDTF |
| 2200                | PDISPEEKAE | VENQIVEREQ | YLKPMYHQA | IHFADLHDTF |
| 319                 | PDISPEEKAE | VENQIVEREQ | YLKPMYHQA | IHFADLHDTF |
| 419                 | PDISPEEKAE | VENQIVEREQ | YLKPMYHQA | IHFADLHDTF |
| 520                 | PDISPEEKAE | VENQIVEREQ | YLKPMYHQA | IHFADLHDTF |
| 619                 | PDISPEEKAE | VENQIVEREQ | YLKPMYHQA | IHFADLHDTF |

|                     |            |            |            |            |
|---------------------|------------|------------|------------|------------|
|                     | 2201       |            |            | 2250       |
| BEMITA_QJQ31013     | DIVPWRKSRT | ILHWRVKRLL | LENQIKSNLL | KVQPQMDGQ  |
| MYZUPE_XP_022181497 | DIVQWKKSRN | TLYWRVKRLL | LQNQIQKVIT | KSNDTIQDDV |
| TRIAVA_ACCase       | DIVPWRKSRS | IIHWRMKRLL | LENQIKSNLI | RVQPQLDDGQ |
| 2200                | NIVPWRKSRT | LLHWRVKRLL | LENQIKCNLL | KVQPQMDNGQ |
| 319                 | NIVPWRKSRT | LLHWRVKRLL | LENQIKCNLL | KVQPQMDNGQ |
| 419                 | NIVPWRKSRT | LLHWRVKRLL | LENQIKCNLL | KVQPQMDNGQ |
| 520                 | NIVPWRKSRT | LLHWRVKRLL | LENQIKCNLL | KVQPQMDNGQ |
| 619                 | NIVPWRKSRT | LLHWRVKRLL | LENQIKCNLL | KVQPQMDNGQ |

|                     |            |            |            |            |
|---------------------|------------|------------|------------|------------|
|                     | 2251       |            |            | 2300       |
| BEMITA_QJQ31013     | EDIGTTTAYL | WENNESVWSW | LMGQLS.PDG | SISPNSIVAN |
| MYZUPE_XP_022181497 | EDKGTASYL  | WDNNQAVVQW | LTSQLEDSDG | TIVADSLIGN |
| TRIAVA_ACCase       | EDKGTTTAYL | WENNESVWSW | LMTQLS.PDG | SISPNSIVAN |
| 2200                | EDKGTTTAYL | WENNESVVAW | LMSQLS.PDG | SISPNSIVAN |
| 319                 | EDKGTTTAYL | WENNESVVAW | LMSQLS.PDG | SISPNSIVAN |
| 419                 | EDKGTTTAYL | WENNESVVAW | LMSQLS.PDG | SISPNSIVAN |
| 520                 | EDKGTTTAYL | WENNESVVAW | LMSQLS.PDG | SISPNSIVAN |
| 619                 | EDKGTTTAYL | WENNESVVAW | LMSQLS.PDG | SISPNSIVAN |

|      |  |  |  |      |
|------|--|--|--|------|
| 2301 |  |  |  | 2350 |
|------|--|--|--|------|

|                     |            |            |            |            |            |
|---------------------|------------|------------|------------|------------|------------|
| BEMITA_QJQ31013     | INQIKSMEE  | SPDVAQDAVV | EMFQTLSASE | RSEVLRKLSH | LETISKPEPQ |
| MYZUPE_XP_022181497 | INQVKSTIND | TPEVTSDVIM | GMFQSLSEMQ | RLDLIHNLTQ | ATSIGNVKLN |
| TRIAVA_ACCase       | INQIKSMEE  | SPDVAQDAVV | EMFQALSSSE | RSEVLRKLSH | LEMINSSEPQ |
| 2200                | INQIKSMEE  | SPDVAQDAVV | EMFQTLSANE | RSEVLRKLSH | LETISKPEPQ |
| 319                 | INQIKSMEE  | SPDVAQDAVV | EMFQTLSANE | RSEVLRKLSH | LETISKPEPQ |
| 419                 | INQIKSMEE  | SPDVAQDAVV | EMFQTLSANE | RSEVLRKLSH | LETISKPEPQ |
| 520                 | INQIKSMEE  | SPDVAQDAVV | EMFQTLSANE | RSEVLRKLSH | LETISKPEPQ |
| 619                 | INQIKSMEE  | SPDVAQDAVV | EMFQTLSANE | RSEVLRKLSH | LETISKPEPQ |

|                     |      |
|---------------------|------|
|                     | 2351 |
| BEMITA_QJQ31013     | S~   |
| MYZUPE_XP_022181497 | S~   |
| TRIAVA_ACCase       | NS   |
| 2200                | S~   |
| 319                 | S~   |
| 419                 | S~   |
| 520                 | S~   |
| 619                 | S~   |
